# Supplementary material
Source: PubMed Central journal article supplement (PMC4012597)
Supplement: supp_pp.113.234369_234369suppdata.pdf [file supp_pp.113.234369_234369suppdata.pdf]

# Helliwell et al. Supplementary Materials

## **RUNNING HEADER: ALGAE AND VITAMIN B<sub>12</sub>**

### Corresponding author:

Alison G. Smith

*Department of Plant Sciences,*

*University of Cambridge,*

*Downing Street, Cambridge,*

*CB2 3EA, UK.*

Email: [as25@cam.ac.uk](mailto:as25@cam.ac.uk), tel.: +44 1223 333952

RESEARCH AREA: BIOCHEMISTRY AND METABOLISM

**Table S1. Identification of proteins from 2-D DIGE**

For each spot, the five Mascot hits with the highest score and at least two unique peptides of rank 1 are listed. For the number and identity of unique peptides, only peptides of rank 1 are considered. Coverage indicates the fraction of the predicted protein that is covered by the identified peptides. Oxidised Met residues are underlined.

| Spot no. | Protein ID    | Total score | Coverage | No. of unique peptides | Unique peptides                                                                                                                                                                                                                                                                                                                                      |
|----------|---------------|-------------|----------|------------------------|------------------------------------------------------------------------------------------------------------------------------------------------------------------------------------------------------------------------------------------------------------------------------------------------------------------------------------------------------|
| 448      | 154307 (METE) | 1505        | 32%      | 24                     | VASAYTR, HLSGLQR, EGLPLKR, LGAGVVDGR, GGAALDMSK, VEEIVSVAR, GAALGAAAGTSR, FAMESYFK, NMVEAAAQAR, FKHLSGLQR, AGWVQSYGSR, GWPETIAALR, SFVDSGILSGR, VQSDAWALQK, ALLDTGAVSSDR, AAQAMQLGLALR, QKVEEIVSVAR, MDADVLTIE <sup>NS</sup> SR, GDSGEAELLAVAHK, SDNAMMAALAAAGYGR, TPEAEPHLPPALAAAR, AVPIIGPVTFVSLSR, LAASPAAAAAAGHGAVVQLQR, AELQLAGGAAVAPVAGGVEAAGK |
|          | 144070        | 104         |          | 2                      |                                                                                                                                                                                                                                                                                                                                                      |
|          | 348055        | 88          |          | 2                      |                                                                                                                                                                                                                                                                                                                                                      |
|          | 345759        | 80          |          | 2                      |                                                                                                                                                                                                                                                                                                                                                      |
|          | 133859        | 70          |          | 2                      |                                                                                                                                                                                                                                                                                                                                                      |
| 455      | 154307 (METE) | 1273        | 30%      | 20                     | VASAYTR, HLSGLQR, EGLPLKR, LGAGVVDGR, GGAALDMSK, GAALGAAAGTSR, <u>N</u> MVEAAAQAR, AGWVQSYGSR, SFVDSGILSGR, VQSDAWALQK, ALLDTGAVSSDR, AAQAMQLGLALR, QKVEEIVSVAR, <u>M</u> DADVLTIE <sup>NS</sup> SR, SVWKDDGTAVALLR, TPEAEPHLPPALAAAR, SDNAM <u>M</u> AALAAAGYGR, LAASPAAAAAAGHGAVVQLQR, AELQLAGGAAVAPVAGGVEAAGK, DIGPGVYDVHSPVPSVEFIK               |
|          | 158948        | 64          |          | 2                      |                                                                                                                                                                                                                                                                                                                                                      |
|          | 60432         | 62          |          | 2                      |                                                                                                                                                                                                                                                                                                                                                      |
|          | 144131        | 53          |          | 2                      |                                                                                                                                                                                                                                                                                                                                                      |
|          | 406827        | 50          |          | 2                      |                                                                                                                                                                                                                                                                                                                                                      |
| 456      | 424119        | 130         | 2.0%     | 3                      |                                                                                                                                                                                                                                                                                                                                                      |
|          | 406498        | 95          |          | 2                      |                                                                                                                                                                                                                                                                                                                                                      |
|          | 133859        | 94          |          | 2                      |                                                                                                                                                                                                                                                                                                                                                      |

|     |                |     |     |   |                                                                                                                                    |
|-----|----------------|-----|-----|---|------------------------------------------------------------------------------------------------------------------------------------|
|     | 122088         | 72  |     | 2 |                                                                                                                                    |
|     | 206241         | 67  |     | 2 |                                                                                                                                    |
| 976 | 129593 (SAHH)  | 326 |     | 7 | IVLGLIR, VAALHLPK, ATDVMIAGK, DSAAVFAWK, HSLPDGIMR,<br>VMGVSEETTTGVK, DGTLPNPDSTDNAEFK                                             |
|     | 400024         | 51  | 14% | 2 |                                                                                                                                    |
|     | 189186         | 50  |     | 2 |                                                                                                                                    |
|     | 340070         | 49  |     | 2 |                                                                                                                                    |
|     | 286417         | 46  |     | 2 |                                                                                                                                    |
| 995 | 196354 (SHMT2) | 588 | 23% | 9 | IGTPAMTSR, YSEGQPGAR, YVATPEFR, GLEGNPAIADIR,<br>YADIVTTTTTHK, QYSEQVVHNCR, NAVVGDLSAMNPPGGVR,<br>ISATSIFFESLPYK, LAVADPEVFALIEDEK |
|     | 60432          | 130 |     | 3 |                                                                                                                                    |
|     | 133859         | 105 |     | 2 |                                                                                                                                    |
|     | 172839         | 74  |     | 2 |                                                                                                                                    |
|     | 423338         | 67  |     | 3 |                                                                                                                                    |

---

**Table S2. Expression ratio of identified spots from 2D-DIGE**

The values are the ratio of expression in *C. reinhardtii* cells grown without B<sub>12</sub> compared to 1000 ng/L vitamin B<sub>12</sub> for those spots altered by at least two-fold ( $P \leq 0.01$ ) (shown on Figure S5).

| Spot no. | Appearance (no.of spot maps) | Identity <sup>1</sup> | Expression ratio | $q$ -value <sup>2</sup> | $P$ -value (t-test) |
|----------|------------------------------|-----------------------|------------------|-------------------------|---------------------|
| 432      | 16                           | METE?                 | 3.63             | 0.058                   | $4.4 \cdot 10^{-4}$ |
| 438      | 14                           | METE?                 | 4.84             | 0.036                   | $1.2 \cdot 10^{-4}$ |
| 448      | 16                           | METE                  | 8.11             | 0.012                   | $2.1 \cdot 10^{-5}$ |
| 455      | 16                           | METE                  | 6.15             | 0.036                   | $1.5 \cdot 10^{-4}$ |
| 456      | 16                           | METE?                 | 4.45             | 0.101                   | $1.7 \cdot 10^{-3}$ |
| 457      | 16                           | METE                  | 2.66             | 0.072                   | $6.3 \cdot 10^{-4}$ |
| 976      | 16                           | SAHH                  | 2.43             | 0.036                   | $1.5 \cdot 10^{-4}$ |
| 995      | 16                           | SHMT2                 | 2.70             | 0.073                   | $7.4 \cdot 10^{-4}$ |
| 1002     | 16                           | SHMT2                 | 2.12             | 0.072                   | $6.7 \cdot 10^{-4}$ |
| 1006     | 16                           | SHMT2                 | 2.16             | 0.099                   | $1.4 \cdot 10^{-3}$ |
| 1010     | 14                           | unknown               | 2.53             | 0.089                   | $9.7 \cdot 10^{-4}$ |

<sup>1</sup> Identity of those indicated with ? inferred from equivalent mobility of spots assigned by MS/MS.

<sup>2</sup> Gillet S, Decottignies P, Chardonnet S, Le Maréchal P (2006) Cadmium response and redoxin targets in *Chlamydomonas reinhardtii*: a proteomic approach. *Photosyn Res* **89**: 201-211.

**Table S3. Characteristics of proteins involved in one-carbon metabolism in *C. reinhardtii* down regulated by B<sub>12</sub>**

| Protein | Protein identifier    | Subunit molecular mass (kDa) | pI                 | Expression ratio  |                           | Evidence for multiple isoforms |
|---------|-----------------------|------------------------------|--------------------|-------------------|---------------------------|--------------------------------|
|         |                       |                              |                    | 2D-DIGE           | RT-qPCR                   |                                |
| METE    | 154307                | 86.8                         | 5.94               | 5.9 <sup>1)</sup> | 7.0                       | √                              |
| METH    | (76715) <sup>3)</sup> |                              |                    |                   | no significant difference |                                |
| SAHH    | 129593                | 52.7                         | 5.39               | 2.4               | (1.7) <sup>2)</sup>       |                                |
| SHMT1   | 194461                | 54.8 <sup>3)</sup>           | 8.65 <sup>3)</sup> |                   |                           |                                |
| SHMT2   | 196354                | 51.9                         | 6.25               | 2.5 <sup>1)</sup> | 2.2                       | √                              |
| SHMT3   | 196400                | 49.0 <sup>3)</sup>           | 8.14 <sup>3)</sup> |                   |                           |                                |

<sup>1)</sup> Average values, assuming that METE migrated to six adjacent spots, and SHMT2 to three adjacent spots (see Figure S5)

<sup>2)</sup> The statistical *P*-value exceeds 0.05

<sup>3)</sup> The values are given for the mature protein, after removal of putative mitochondrial target peptide predicted by TargetP

**Table S4. Strains, origin, and growth conditions for each alga grown during this study**

| Species                                                                                               | Origin                                                                                          | Type of Growth Media                 | Reference | Conditions                                                                          |
|-------------------------------------------------------------------------------------------------------|-------------------------------------------------------------------------------------------------|--------------------------------------|-----------|-------------------------------------------------------------------------------------|
| <i>Chlamydomonas reinhardtii</i> strain 12 <sup>1</sup> , a wild-type strain derived from strain 137c | <i>Chlamydomonas</i> Culture Collection                                                         | TAP                                  | 2         | 25 °C, 140 rpm under continuous light (100-150 $\mu\text{E m}^{-2} \text{s}^{-1}$ ) |
| <i>C. reinhardtii</i> cell-wall-deficient-strain (cw15, mt <sup>-</sup> )                             |                                                                                                 |                                      |           |                                                                                     |
| <i>Phaeodactylum tricornutum</i> (CCAP 1052/1B)                                                       | Culture Collection of Algae and Protozoa (CCAP)                                                 | f/2                                  | 3,4       | 15°C, 16:8 hours light:dark cycle                                                   |
| <i>Coccomyxa subellipsoidea</i> (C-169)                                                               | A gift from Dr James Van Etten (Department of Plant Pathology, University of Nebraska-Lincoln). | Bold's Basal Media (BBM)             | 5,6       | 25 °C, 140 rpm under continuous light (100-150 $\mu\text{E m}^{-2} \text{s}^{-1}$ ) |
| <i>Cyanidioschyzon merolae</i> (M10)                                                                  | A gift from Kan Tanaka (Tokyo Institute of Technology, Japan)                                   | Double Strength Modified Allen (MA2) | 7         | 37 °C , with shaking (~110 revs/ minute)                                            |

- <sup>1</sup>Croft MT, Lawrence AD, Raux-Deery E., Warren, MJ, Smith AG. (2005) Algae acquire vitamin B<sub>12</sub> through a symbiotic relationship with bacteria. *Nature* **438**:90-93.
- <sup>2</sup>Rochaix J-D, Mayfield S, Goldschmidt-Clermont M, Erickson J (1988) Molecular Biology of *Chlamydomonas*. *Plant Molecular Biology - a Practical Approach*, ed Shaw CH (IRL Press, Oxford), pp 253-275.
- <sup>3</sup>Guillard RRL, and Ryther JH (1962) Studies of marine planktonic diatoms. I. *Cyclotella nana* Hustedt and *Detonula confervacea* Cleve. (*Can. J. Microbiol*), pp 229-239.
- <sup>4</sup>Guillard RRL (1975) Culture of phytoplankton for feeding marine invertebrates. *Smith W.L. and Chanley M.H (Eds.) Culture of Marine Invertebrate Animals.*, (Plenum Press, New York, USA), pp 26-60.
- <sup>5</sup>Bold HC (1949) The morphology of *Chlamydomonas chlamydogama*, sp. nov. *Bulletin of the Torrey Botanical Club.* **76**:101-108.
- <sup>6</sup>Bischoff HW, Bold, H.C. (1963) Phycological Studies. IV. Some soil algae from Enchanted Rock and related algal species. (University of Texas Publication) **6318**: 1-95.
- <sup>7</sup>Minoda A, Sakagami R, Yagisawa F, Kuroiwa T, Tanaka K (2004) Improvement of culture conditions and evidence for nuclear transformation by homologous recombination in a red alga, *Cyanidioschyzon merolae* 10D. *Plant and Cell Physiology* **45**:667-671.



**Table S5. Primers and conditions used for RT-PCR**

| Gene                               | Primer name   | Sequence (5'→3')         |
|------------------------------------|---------------|--------------------------|
| <i>P. tricornutum</i> <sup>1</sup> |               |                          |
| <i>METE</i>                        | METE-F1       | ACGACGCGTATGTTTTCCAT     |
|                                    | METE-R1       | TGGTAGTTGCTCGTGAT        |
| <i>H4</i>                          | HISTONE H4-F1 | AGGTCCTTCGCGACAATATC     |
|                                    | HISTONE H4-R1 | ACGGAATCACGAATGACGTT     |
| <i>RPS</i>                         | RPS-F1        | CGAAGTCAACCAGGAAACCAA    |
|                                    | RPS-R1        | GTGCAAGAGACCGGACATACC    |
| <i>TBP</i>                         |               | ACCGGAGTCAAGAGCACACAC    |
|                                    | TBP-F1        | CGGAATGCGCGTATAACCAGT    |
|                                    | TBP-R1        |                          |
| <i>C. reinhardtii</i> <sup>2</sup> |               |                          |
| <i>METE</i>                        | 46-METE-F     | GCCGCCCTGCGCAACATGGT     |
|                                    | 47-METE-R     | CAGTCCACGCAGCGGCTGGTT    |
| <i>METH</i>                        | 40-METH-F     | TGATCCGTGCCTTCCCCATTG    |
|                                    | 41-METH-R     | GTCGTGCGCCCGCAGCCTTGT    |
| <i>SAHH</i>                        | 6-SAH1NOR-F   | CCAAGAAGGTGATGGGCGTGTCT  |
|                                    | 7-SAH1NOR-R   | GCGGTAGTGGGCGGGCTTGTA    |
| <i>SHMT2</i>                       | 8-SHMT2NOR-F  | CGCGCTGCTGATGGTGGACAT    |
|                                    | 9-SHMT2NOR-R  | TCGGCGGCAGGCACGGTGAA     |
| <i>RACK1</i>                       | RACK1-for     | GCCACACCGAGTGGGTGTCGTGCG |
|                                    | RACK1-rev     | CCTTGCCGCCCGAGGCGCACAGCG |
| <i>C. merolae</i> <sup>3</sup>     |               |                          |
| <i>METE</i>                        | METE-F1       | AAACCAGCACTTTGCGATCT     |
|                                    | METE_R1       | GATTTTCCAGAATGCCTCCA     |
| <i>EF1a</i>                        | EF1a_F        | GGCTTTGTA4TGCGGAGACAG    |
|                                    | EF1a_R        | CCGCCTCTTTCTTGTTGACC     |

<sup>1</sup>For *P. tricornutum*, reaction mixtures contained 4 ng cDNA, 100 nM of each primer, and 3.5 mM MgCl<sub>2</sub>. Cycling conditions on a Qiagen Rotor-Gene Q instrument were: 95°C for 10 min, followed by cycles of 95°C for 5 s and 65°C for 15 s, up to a total of 40 cycles.

<sup>2</sup>For *C. reinhardtii*, reaction mixtures contained 400 nM of each primer, 2 mM MgCl<sub>2</sub> and 5% DMSO. To amplify *METE*, 6.4 mM (NH<sub>4</sub>)<sub>2</sub>SO<sub>4</sub> and 27 mM Tris, pH 8.8, was further included in the reaction mixture (*RACK1* could be amplified in both buffer conditions). Amplification conditions on a DNA Engine PTC-200 thermal cycler equipped with a Chromo4 detector (Bio-Rad) were as follows: 1 cycle of 95 °C for 2 min; 40 cycles of 95 °C for 20 s, 65 °C for 30 s, 72 °C for 30 s, 83 °C for 5 s after which fluorescence was read; followed by 72 °C for 7 min). *RACK1* (=CBLP) primers are from Erikson et al., 2009.

<sup>3</sup>For *C. merolae*, reaction mixtures contained 125 nM of each primer, 2 mM MgCl<sub>2</sub> and 5% DMSO. Amplification conditions on a TC-5<sub>12</sub> gradient instrument (Techne) were: 94 °C for 5 minutes, cycles of (94 °C for 45 s, 63 °C 45 s, 72 °C for 2 min), and 72 °C for 10 min. Cycle number was optimized (Figure S4) to 35 and 23 cycles for *METE* and *EF1a* respectively.

**Table S6 PCR primers employed for the amplification of DNA fragments for reporter construct generation.** The Chloramphenicol (Chl) resistance gene was isolated from plasmid pBAD24 (Guzman et al., 1995), the origin of replication was isolated from pUC18, HSP70A/RBCS2 fusion and METE promoters were isolated from plasmid pRBCS2 and pMETE-Ble.GFP, respectively.

| DNA fragment          | Primer                       | Primer sequence (5'-3')                                                                         |
|-----------------------|------------------------------|-------------------------------------------------------------------------------------------------|
| Chl resistance        |                              |                                                                                                 |
| Chl - RPS29           | RPS29-BAD F                  | AATGCCCGAATGTTGGGTATCTAGCTCACACGGC<br>AGTTTGTAAGGTGCTGAGGCGTTGCTAAATCAGT<br>AAGTTGGCAGCATCAC    |
|                       | BAD-PUC R                    | CCTTAAACGCCTGGTGCTACGCAGATACCAAATA<br>CTGTCCTTCTAGTG                                            |
| Origin of replication |                              |                                                                                                 |
| ORI-RBCS2             | BAD-PUC F                    | CCTTAAACGCCTGGTGCTACGCAGATACCAAATA<br>CTGTCCTTCTAGTG                                            |
|                       | pUC-HSP70A R                 | CAAGCCTCAGCGAGCTCCCCGCCGTCGTACCGAG<br>CTCGAATTCGTAATC                                           |
| ORI-METE              | BAD-PUC F                    | CCTTAAACGCCTGGTGCTACGCAGATACCAAATA<br>CTGTCCTTCTAGTG                                            |
|                       | pUC-METE R                   | GTTGTAGGCTCTGGTCCTGACCTACGTACCGAGC<br>TCGAATTCGTAATC                                            |
| Promoter & 5'UTR      |                              |                                                                                                 |
| HSP70A/RBCS2 promoter | pUC-HSP70A F                 | TGACCATGATTACGAATTCGAGCTCGGTACGACG<br>GCGGGGAGCTCGCTGAGGCTTGACAT                                |
|                       | -RBCS2 UTR HSP70A-Ble R      | GGTCAGCTTGGCCATTTAAGATGTTGAGTGACTT<br>CTCTTGT                                                   |
| METE promoter         | pUC-pMETE F                  | TGACCATGATTACGAATTCGAGCTCGGTACGTAG<br>GTCAGGACCAGAGCCTACAAC                                     |
|                       | - METE UTR METE UTR R        | GTTGACAGATGTTGATTCCCAAGGAC                                                                      |
| METE promoter         | pUC-pMETE F                  | TGACCATGATTACGAATTCGAGCTCGGTACGTAG<br>GTCAGGACCAGAGCCTACAAC                                     |
|                       | - RBCS2 UTR pMETE-RBCS2ble R | CAGCTTGGCCATTTTAAGATGTTGAGTGACATGT<br>CACTTAAATAATCGGCCTG                                       |
| HSP70A/RBCS2 promoter | pUC-HSP70A F                 | TGACCATGATTACGAATTCGAGCTCGGTACGACG<br>GCGGGGAGCTCGCTGAGGCTTGACAT                                |
|                       | pRBCS2-METE R                | CCTTGTGCAGTCAGACAGAATTGCAAACAACAA<br>TCGGATGCTCATGCATGGTACCAATTCTCTTGTA<br>AAAAGTAAAGAACATAGGCC |
| Reporter & 3'UTR      |                              |                                                                                                 |
| RBCS2 UTR - Ble.GFP   | RBCS2-Ble F                  | GTCACTCAACATCTTAAAATGGCCAAGCTGACCA<br>GCGCCGTT                                                  |

|                      |             |                                                                                                   |
|----------------------|-------------|---------------------------------------------------------------------------------------------------|
|                      | GFP-RPS29 R | CAACGCCTCAGCACCTTACAAACTGCCGTGTGAG<br>CTAGATACCCAACATTCGGGCATTTTACTTGTAC<br>AGCTCGTCCATGCCGT      |
| METE UTR-<br>Ble.GFP | METE-Ble F  | TTGTTGTTTTGCAATTCTGTCTGACTGCACAAGGA<br>ACCCGTCCTTGGGAATCAACATCTGTCAACATGG<br>CCAAGCTGACCAGCGCCGTT |
|                      | GFP-RPS29 R | CAACGCCTCAGCACCTTACAAACTGCCGTGTGAG<br>CTAGATACCCAACATTCGGGCATTTTACTTGTAC<br>AGCTCGTCCATGCCGT      |

---

## Supplementary Figures

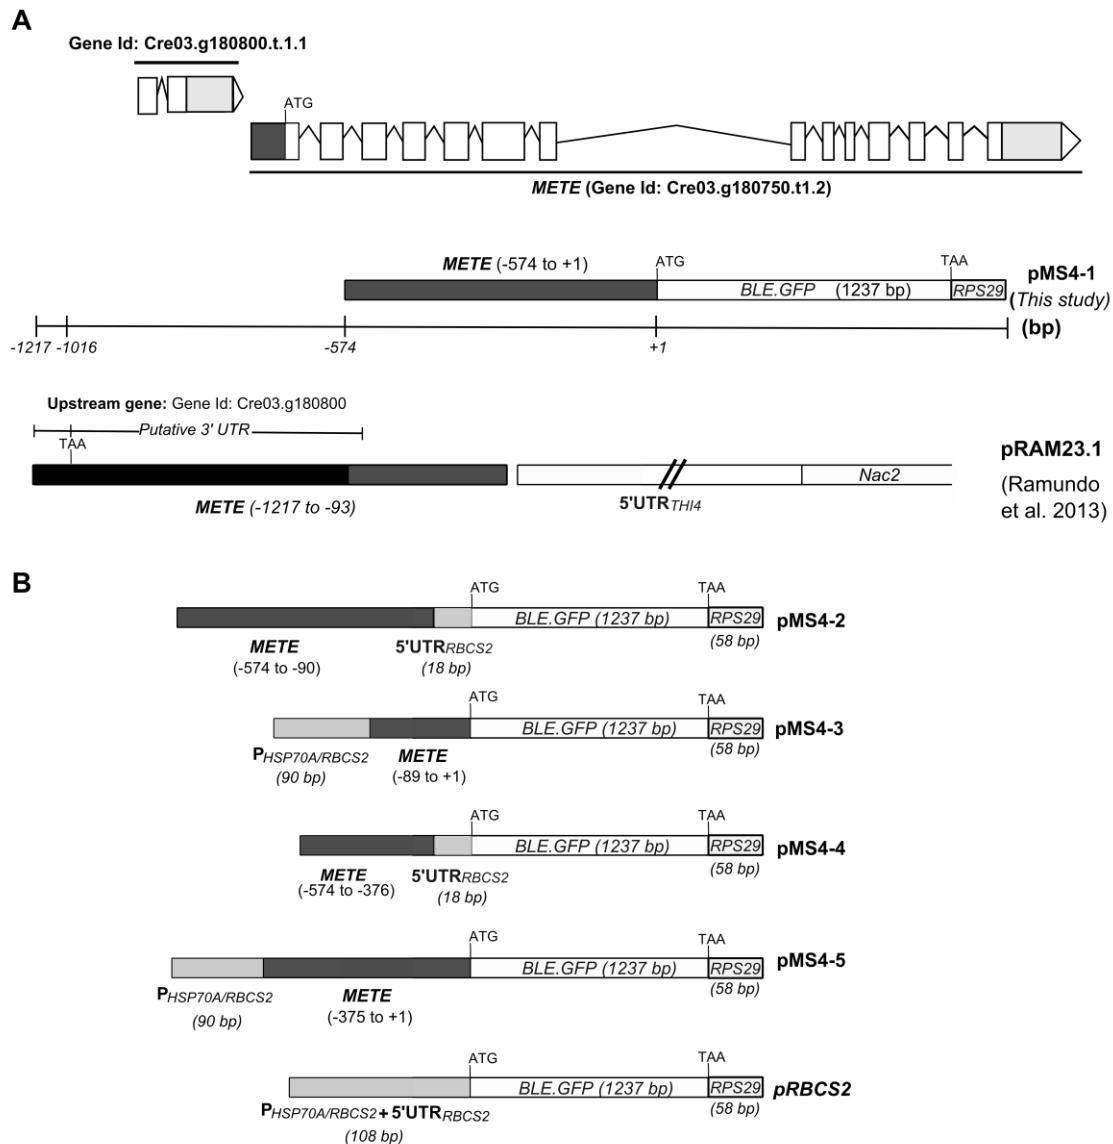

**Figure S1. Schematic diagram of reporter constructs used in this study. A.** Plasmid pMS4-1 incorporates -574 to +1bp upstream of the *C. reinhardtii* *METE* gene as the promoter and 5'UTR for the reporter gene *sh.Ble.GFP*. Shown underneath for comparison is the pRAM23.1 construct used by Ramundo et al. (2013), which showed a slight response to B<sub>12</sub>. This contains a region upstream of *METE*, but it contains part of the coding sequence of the upstream gene (gene Id: Cre03.g180800 (v3)), and extends to -93 of *METE*. **B.** All other constructs used in this study.

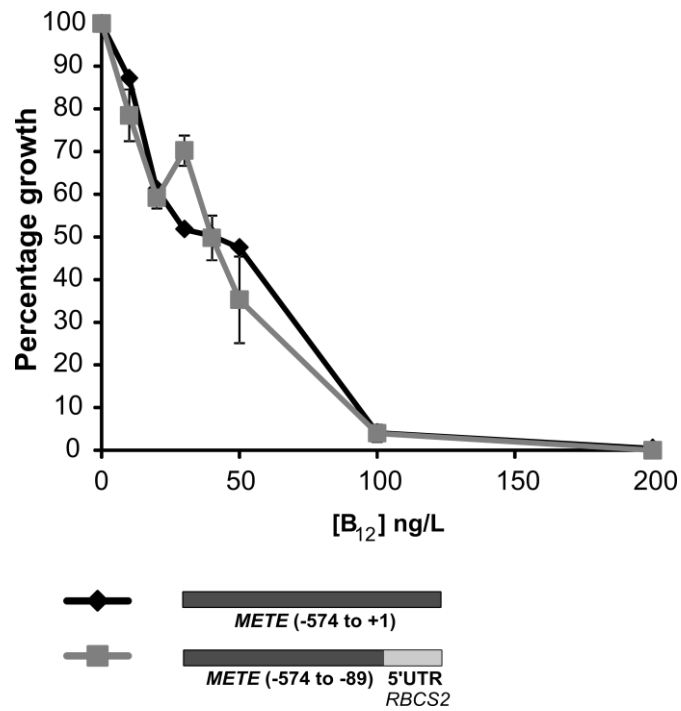

**Figure S2.** B<sub>12</sub> dose response of pMS 4-1 (transformant no. 4, Fig. 2C) and pMS 4-2 (transformant no. 3, Fig. 2D) to different concentrations of vitamin B<sub>12</sub>. Growth was calculated as a percentage of maximal growth i.e. at t=120 h in the -B<sub>12</sub> treatment. Error bars denote standard error (n=3).

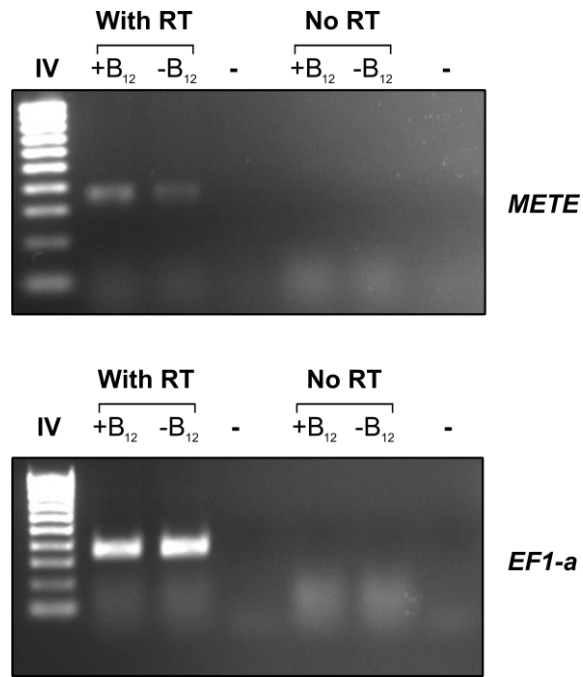

**Figure S3. *METE* expression is not repressed by B<sub>12</sub> in the thermophilic red alga *C. merolae*.** RT-PCR analysis of transcripts for *METE* and *EF1-A* following growth + B<sub>12</sub> or - B<sub>12</sub>. The following cycle number for each primer set was used throughout: *METE* (35 cycles) and *EF1-A* (23 cycles), see Figure S4.

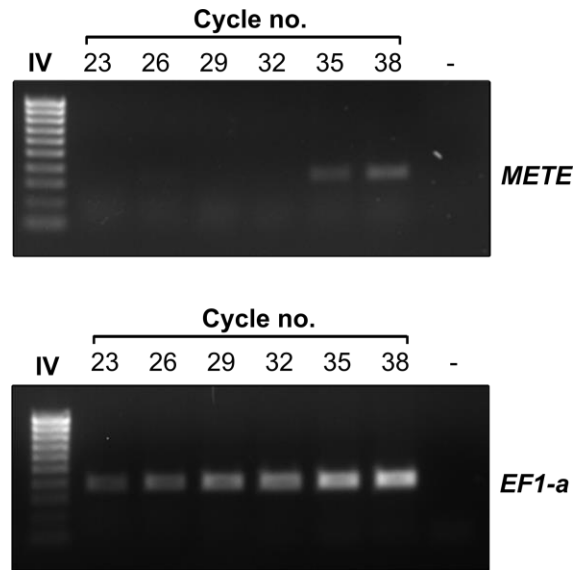

**Figure S4. RT-PCR cycle number optimization for *METE* and *EF1-A* expression in *C. merolae*.** RT-PCR analysis was performed on cDNA made from RNA harvested from cultures of *C. merolae* grown without B<sub>12</sub>.



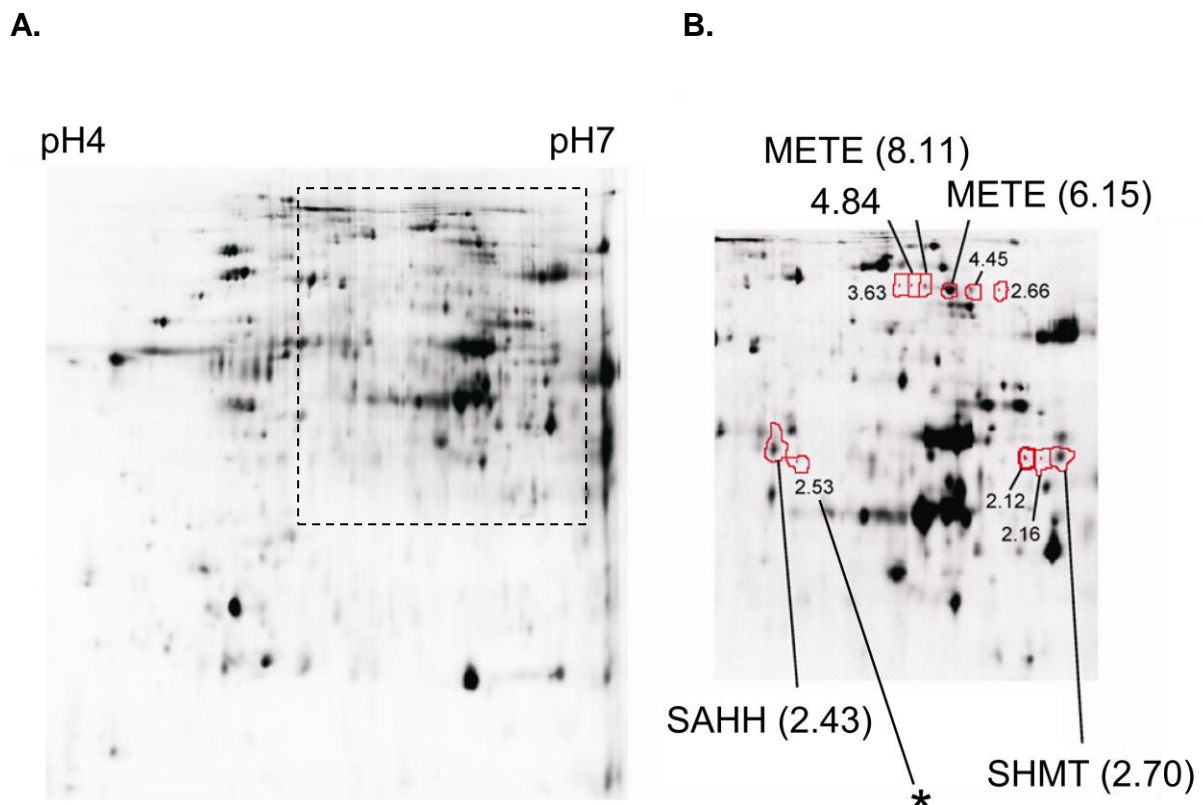

**Figure S5. Investigating B<sub>12</sub>-responsive genes in *C. reinhardtii* by 2D-DIGE** Algae were grown in the presence or absence of 1000 ng/L vitamin B<sub>12</sub>, then extracted protein samples were labelled with Cy5, mixed with a Cy3-labeled standard (made up of equal amounts of each of the samples pooled) and separated by 2D gel electrophoresis, followed by silver staining. **A.** Representative Cy5 spot map for proteins from *C. reinhardtii* grown in the absence of B<sub>12</sub>. **B.** Expanded region of gel shown by dashed box in panel A. The spots outlined in red are those that were found to be down-regulated by B<sub>12</sub>, by at least a twofold difference in regulation and  $P \leq 0.01$  (two-tailed t-test). The actual values are indicated next to the highlighted spots. To identify the proteins, spots were excised from the gel, digested with trypsin and analysed by MS/MS. Three spots were identified as METE (B<sub>12</sub>-independent methionine synthase), SAHH (S-adenosylhomocysteine hydrolase) and SHMT2 (serine hydroxymethyltransferase isoform 2). The spot indicated with an asterisk could not be identified.

## SUPPLEMENTARY REFERENCES

Guzman LM, Belin D, Carson MJ, Beckwith J (1995) Tight regulation, modulation, and high-level expression by vectors containing the arabinose PBAD promoter. *Journal of Bacteriology* **177**: 4121- 4130.

Eriksson M, Moseley JL, Tottey S, Del Campo JA, Quinn J, Kim Y, Merchant S. (2004) Genetic dissection of nutritional copper signaling in *Chlamydomonas* distinguishes regulatory and target genes. *Genetics* **168**: 795-807

Ramundo S, Rahire M, Schaad O, Rochaix J-D (2013) Repression of essential chloroplast genes reveals new signaling pathways and regulatory feedback loops in *Chlamydomonas*. *Plant Cell* **25**: 167-186
